# Supplementary material
Source: publisher figshare collection journal article supplement (https://tandf.figshare.com/ndownloader/files/17589134)
Supplement: Supplementary file 1 [file 17589134]

**Supplementary table 1.** Information of the patients with ectopic fascioliasis.

| **Ectopic site** | **Sex/ age/ country/ occupation/ year of report/ ref** | **Symptoms/signs** | | | **Risk factors** | | **Diagnostic methods** | | **Outcome** | | | |
| --- | --- | --- | --- | --- | --- | --- | --- | --- | --- | --- | --- | --- |
| **Skin** | M/ 36 y/ Iran/ worker/ 1987/ [1] | 1- Abdominal pain  2- Fever  3- Painful nodules in the chest | | | N. R | | 1- HE in nodules: granulomatous reactions and also, a transverse section of *Fasciola* spp. was observed  2- *Fasciola* ova in stool: negative  3- Anemia: negative  4- CR: normal | | Cured | | | |
| F/ 40 y/ Vietnam/ farmer/ 2005/ [2] | 1- Burning pain at the abdominal  2- Epigastric pain  3- Cutaneous nodules of egg-like and painless in epigastric region  3- Serpentine track under the skin  4- Anorexia, Asthenia, Dizziness | | | 1- She is farmer  2- picking raw watercress | | 1- US examination of both the liver and skin lesion: some small cyst at the liver and serpentine tunnel like track on the skin was seen  2- Aspiration collectedfrom serpentine tunnel like track on the skin: *Fasciola* spp. was observed  3- *Fasciola* ova in stool: negative  4- Serologic test for fascioliasis: positive | | N. R | | | |
| M/ 4 y/ China/ N.R/ 2010/ [3] | 1- Abdominal pain  2- Recurrent bouts of fever  3- Multiple cutaneous nodules had emerged at the epigastric region and serpentine track also appeared under the skin at the same site | | | 1- drinking raw water  2- eating raw watercress | | 1- HE in skin cysts: revealed multiple abscesses, Charcot-Leyden crystals, granulomatous reactions and also juvenile stage *Fasciola* spp. was identiﬁed  2- CT scan and MRI: showed dilatation of intrahepatic bile ducts  3- US: showed multiple poor echo structure in the left lobe of the liver  4- *Fasciola* ova in stool, urine test: negative  5- Liver function tests: normal  6- Eosinophil ratio: 44% (high) | | N. R | | | |
| **Subcutaneous** | F/ 32 y/ Korea/ Teacher, housewife/ 1991/ [4] | An indolent mass at the chest wall | | | N. R | | 1- Laboratory tests: normal  2- Chest X-ray film: revealed a localized swelling of soft tissue at her left lower chest wall  3- US: a solid mass with heterogenous echogenicity were seen  4- EB on vascular lesion: granulomatous lesion and also immature *Fasciola* spp. was identiﬁed  5- ELISA for fascioliasis: positive | | Cured | | | |
| F/ 23 y/ Iran/ housewife/ 1995/ [5] | A painful mass 2x3 cm in size in her right axillary area accompanied with right upper quadrant pain and intermiuent fever | | | 1- live on a farm and contact with livestock  2- Consuming raw vegetables | | 1- HE on nodule: revealed granulomatous reactions and also immature stage *Fasciola* spp. was identiﬁed  2- Liver function tests: normal  3- IFAT for fascioliasis: positive  4- *Fasciola* ova in stool: negative  5- Abdominal examination: normal  6- Chest 'x-ray: normal | | N. R | | | |
| **Eye** | M/ 28 y/ Korea/ N.R/ 1994/ [6] | 1- Headache and motor weakness for a month  2- Sudden pain and blindness of the right eye  3- The enucleated eye revealed areas of a focal degeneration of sclera and intraocular hemorrhage | | | N. R | | 1- Ophthalmoscopy: a worm was recognized penetrating the iris, occupying the anterior chamber. The flatworm detected in the anterior chamber was identified to be a juvenile *Fasciola* spp.  2- Microscopic findings: an abrupt tissue defect and few inflammatory reactions in the uvea | | N. R | | | |
| F/ 44 y/ Iran/ N.R/ 2005/ [7] | Accompanied with a red, painful left eye for 10 days | | | She was living in Guilan, where human fascioliasis was endemic | | 1- Ophthalmoscopy: A small, flat, moving parasite was seen in the anterior chamber. The flatworm detected in the anterior chamber was identified to be an immature *Fasciola* spp.  2- SL examination: endophthalmitis in left  3- US for eye: showed a flat retina  4- US for liver: normal  5- Haematology and biochemistry analysis: normal  6- Liver function tests: normal  7- IFAT for fascioliasis: negative  8- *Fasciola* ova in stool: negative | | 1- Visual acuity decreased  2- Corneal edema  3- Deep vasculisation | | | |
| **Brain and eye** | M/ 8 y/ China/ N.R/ 2007/ [8] | 1- Accompanied with 6 months headache, nausea and vomiting  2- Swelling of the right eyelid accompanied with conjunctiva edema and mild protrusion of the eyeball  3- An itchy and aching sensation on his right lower eyelid | | | Drinking unsafe water | | 1- CT scan: showed hemorrhage of the left parietal lobe  2- DSA: showed a possible right middle cerebral artery aneurysm and left vertebral artery aneurysm  3- Ophthalmoscopy: revealed blurred margins of the bilateral optic disc, optic disc and surrounding area edema of the right eye. Immature *Fasciola* spp. was recognized underneath the mucosa of his right lower eyelid  4- Abdominal ultrasonography: mild hepatomegaly  5- liver function tests: normal  6- *Fasciola* ova in stool: negative | | Cured | | | |
| M/ 10 y/ China/ Student/ 2008/ [9] | 1- Intermittent headache  2-vomiting  3- Fever  4- Ophthalmalgia  5- Eyelid swelling  6- Conjunctival chemosis  7- Vision loss of the right eye | | | The boy came from an area with a higher incidence of fascioliasis | | 1- Ophthalmologic examination: showed that there was bilateral papilledema and narrowness of the right rima oculus, and also a small leaf-shaped parasite was found to have moved out of the swollen conjunctiva of the right eye was identified to be an immature *Fasciola* spp.  2- Head CT scan: showed that there was a hematoma in the right occipital lobe and a subacute subdural hematoma in the left temporoparietal lobe  3- Head DSA: revealed 2 intracranial saccular aneurysms  4- Head MRI: revealed a large new subdural hematoma in the left frontotemporoparietooccipital lobe  5- ELISA and IHA for fascioliasis: positive  6- Eosinophil ratio: a slight increase (6.7%)  7- Liver function test: normal  8- blood coagulation test: normal  9- CT scan and US of the abdomen: mild enlargement of the liver with a normal bile duct tree and no nodules in the liver.  10- The ESR and the level of CRP: mildly increased  11- Chest x-ray and electrocardiogram: normal  12- *Fasciola* ova in stool: negative | | Cured | | | |
| F/ 44 y/ Argentina/ N.R/ 1967 [10] | 1-Headache  2-Aphasia with opisthotonos  3-Delirium,  3-Psychotic symptoms  4-Spasm of the extrinsic ocular muscles | | | She often ate  salads made of raw vegetables and especially  of watercress | | 1- Neurological examination: was normal except for right hyperreflexia.  2- Laboratory tests:  -Blood urea nitrogen and blood sugar values were normal.  -Total blood protein was slightly diminished.  -Urinalysis was normal.  3- Anemia: slight  6- X-rays of the skull: normal.  7-Electroencephalogram: revealed a left frontotemporal focus.  8-Microscopic examination of brain tissue showed a great number of eggs of the *F. hepatica*. | | Died | | | |
| **Caecum and colon** | F/ 19 y/ Korea/ N.R/ 1982/ [11] | 1- Abdominal pain  2- Mild fever  3- Anorexia  4- Weight loss  5- Non-tender mass in the RUQ of the abdomen | | | N. R | | 1- HE: revealed a worm structure impacted in the muscle coat was identified to be an immature *Fasciola* spp.  2- Eosinophil ratio: 23% (high)  3- *Fasciola* ova in stool: negative  4-Stool was positive for occult blood  5- Colon x-ray: revealed ‘finger print’ shadow in caecum and asceding colon  6- IP for the suspicious retroperitoneal mass: normal  7- Colon fiberoscopy: normal | | N. R | | | |
| **Caecum** | F/ 27 y/ Korea/ N.R/ 1984/ [12] | 1- A palpable mass in the right lower abdomen  2- Nausea and vomiting | | | N. R | | 1- HE: sections of cecal wall contained a worm structure. The flatworm was identified as juvenile stage *Fasciola* spp.  2- X-rays of chest, abdomen and gallbladder: normal  3- FE of the stomach and esophagus: normal  4- *Fasciola* ova in stool: negative  5- IP: normal | | N. R | | | |
| **Colon** | M/ 55 y/ Turkey/ N.R/ 2007/ [13] | 1- Abdominal pain  2- A solid mass, originating from the right colon was found | | | N. R | | 1- HE of the colon: revealed granulomas with central necrosis and Charcot Leyden crystals, surrounded by an inflammatory infiltrate with eosinophils secondary to *Fasciola* spp.  2-Abdominal US: showed gallstones in the gallbladder  3- CT scan: showed a 4cm × 7 cm intraluminal mass originating from the ascending colon  4- Laboratory findings, including liver function tests, ESR, WBC count and tumor markers were unremarkable.  5- Eosinophil ratio: normal  6- IHA for fascioliasis: positive | | Cured | | | |
| F/ 46 y/ Turkey/ N.R/ 2009/ [14] | 1- Abdominal pain  2- Abdominal tenderness and a mass on her upper left quadrant  3- Malaise  4- Nausea and vomiting | | | Eating raw watercress | | 1- HE of the colon: showed the presence of a colonic granulomatous lesion due to *Fasciola* spp.  2-US and CT scans of the abdomen: showed the presence of  amorphous cystic lesion  * Eosinophil ratio: normal  * IHA for fascioliasis: positive | | Cured | | | |
| **Abdominal** | M/ 6 y/ Turkey/ N.R/ 2011/ [15] | 1- Abdominal pain, tenderness and rigidity  2- Fever  3- Diarrhea  4- Weight loss | | | N.R | | 1- HE: showed granulomatous lesions containing multinuclear giant cells and histiocytes  2- *Fasciola* ova in stool: negative  3-Physical examination: fever (38.7°C), diffuse abdominal tenderness and rigidity  4- X-rays of the abdomen: showed air fluid level in the right lower quadrant  5- US of the abdomen: showed intra-abdominal fluid collection  6- CR and thorax CT scan: normal  7- Serologic tests for cytomegalovirus, Epstein-Barr virus, human immunodeficiency virus, salmonella, and brucella: negative  8- IgE: high, 1300 U/ml (normal: 0-90 U/ml)  9- IHA for fascioliasis: positive  10- Nitroblue tetrazolium test and dihydrorhodamine assay were normal for chronic granulomatous disease | | Cured | | | |
| **Mesocolon** | F/ 56 y/ Korea/ N.R/ 2015/ [16] | 1- Abdominal pain, tenderness  2- Abscess was found in the left lower paracolic gutter | | | Eating lotus leaf extracts for a few months | | 1- HE of the colon: showed numerous eggs of *Fasciola* spp. with acute and chronic granulomatous inflammations due to adult worm of *Fasciola* spp.  2- ELISA for fascioliasis: positive  3- CT scan of the abdomen: an abscess was found in the left lower paracolic gutter  4- Physical examination: revealed tenderness in the left lower quadrant of the abdomen  5- Eosinophil ratio: 13.8% (high)  6- Serum elec­trolytes and liver enzymes: normal range | | Cured | | | |
| **Pancreas** | M/ 72 y/ Japan/ N.R/ 1991/ [17] | Abdominal pain | | | N. R | | 1- Resection of the pancreatic and total gastrectomy was performed. A lot of parasite eggs were found in the lesion. The size and shape of parasite eggs identified them as those of *Fasciola* spp.  2- US and CT scans of the abdomen: showed a space-occupying lesion in the pancreatic body.  3- ERP: revealed a cystic mass in the pancreatic body.  4- Ouchterlony test and immunoelectrophoresis: indicated the infection was *Fasciola* spp. | | N. R | | |
| F/ 31 y/ Spain/ N.R/ 2005/ [18] | 1- Abdominal pain  2- nausea  3- severe tenderness in epigastrium with hypoactive  bowel sound | | N. R | | 1- ES was done with extraction of multiple fluke *Fasciola* spp.  2- US and CT scans of the abdomen: showed diffuse enlargement of the pancreas  3- Cholangiogram: showed dilatation and numerous filling defects in the main bile duct.  4- Laboratory test: revealed high serum levels of  pancreatic enzymes | | Cured | |
| F/ 60 y/ Turkey/ N.R/ 2007/ [19] | 1- Abdominal pain  2- nausea and vomiting | | The patient lived near the water | | 1- HE on Pancreas: Two leaf-shaped helminths were observed. The flatworm was identified to be a *Fasciola* spp.  2- US of the abdomen: revealed bile sludge in the gallbladder as well as diffuse and fusiform dilation of the extrahepatic bile ducts  3- CT scan of the abdomen: revealed a distended gallbladder  4- *Fasciola* ova in stool and the bile fluid: positive  5- ELISA for *F. hepatica*: positive | | Cured | |
| **Neck** | M/ 58 y/ Peru/ N.R/ 2009/ [20] | 1- Asymptomatic, soft, mobile and painless lump on the left side of his neck that had been present for over a year  2- No other symptoms were evident | | 1-living in a livestock-raising area  2- Eating atajo* on a daily basis  *Atajo is a vegetable similar to watercress that grows in streams | | 1- CT scan were reported as an inflammatory lesion  2- SB: showed granuloma with multinucleated giant cells, which contained structures of refringent wall with cuticle, probably belonging to a parasite.  3- HE: revealed eggs of a trematode, probably *Fasciola* spp., in the subcutaneous tissue with cellular inflammation and eosinophils  4- Immunohistochemistry stain: showed numerous *Fasciola* spp. eggs forming granulomas surrounded by fibrous tissue  5- *Fasciola* ova in stool: negative  6- Eosinophil ratio: normal  7- US of the abdomen: normal  8- WB for fascioliasis: positive | | Cured | |
| F/ 24 y/ Iran/ N.R/ 2017/ [21] | 1- The neck mass was located on the anterior aspect of left thyroid lobe  2- The thyroid lobe had a nodule, with soft consistency, and mobile, no adhesion. | | Contact with cow, rooster, and regional meadow animals | | 1- Pathology diagnosis of the muscle biopsy and thyroid revealed presence of granulomatous reaction around parasitic larvae.  2- Serologic test for fascioliasis: positive  3- CT scan revealed a large solid mass containing multiple cystic components in anterior thyroid lobe | | N. R | |
| **Peritoneal** | M/ 79 y/ Iran/ N.R/ 2012/ [22] | 1- Abdominal pain  2- Nausea  3- Intestinal obstruction symptoms | | Consumption of watercress | | 1- HE: showed numerous eggs of *Fasciola* spp. with dense mixed inflammatory cells infiltration and fibrosis in peritoneal masses  2- IHA for *Fasciola* spp.: positive | | Cured | | |
| **Lymph node** | First patient: F/ 46 y/ Australia/ N.R/ 1992/ [23]  Second patient: M/ 34 y/ Australia/ abattoir worker/ 1992/ [23] | Both patients presented with acute, superficial swelling in cervical | | The second patient was abattoir worker | | 1- HE showed: First patient: the lump was found to be a cervical lymph node containing a mature *Fasciola* spp. which had released eggs into surrounding tissues.  Second patient: subcutaneous lesion resembled an infected sebaceous cyst and contained an immature fluke.  2-For both patients, *Fasciola* ova in stool: negative  3- For both patients, eosinophil ratio: normal  4- A serological test for fascioliasis was carried out in the second case and the result was positive. | | Cured | | | | | |
| **Lung** | F/ 56 y/ Caucasian/ N.R/ 2013/ [24] | 1- complaining of right-sided chest pain  2- A low-grade fever with chills  3- a cough with foul-tasting sputum  4- Weight loss | | N. R | | 1- HE of the bronchial alveolar lavage was showed the presence of eosinophils and Charcot-Leyden crystals and parasite eggs  2- Bronchoscopy: the microscopy of the bronchial washings revealing eggs of the trematode *Fasciola* spp.  3- CR (x-ray) revealed a lung abscess.  4- CT scan of the chest revealed a rupture of the abscess into the pleural cavity  5- The liver scan revealed gallstones in the left lobe, suggestive of multiple liver cysts.  6- IFAT for fascioliasis: positive | | Cured | | | | | |
| **Dorsal Spine** | F/ 30 y/ India/ N.R/ 2006/ [25] | | 1- Gradual onset bilateral lower extremity weakness and numbness  2- She had sensory–motor spastic paraplegia at T6 vertebra, with bladder and bowel involvement.  3-Neuroimaging revealed an epidural mass lesion isointense on T1 and hyperintense on T2, extending from the T4–T7 vertebra with epidural cord compression. | N. R | | 1- Surgery and T4–T7 laminectomy was performed. During removal of the epidural mass, a live, intact, mobile, leaf-like, flat, pink colored parasite was seen deep inside the epidural granulation tissue. The parasite was confirmed as *Fasciola* spp.  2- *Fasciola* ova in stool: negative  3- US of the abdomen: normal | | Cured | | | | | |

N.R: Not reported. IFAT: indirect immunofluorescence test. IHA: indirect haemagglutination. CR: chest radiography. CRP: C-reactive protein. CT: computedtomography. DSA: digital subtraction angiography. EB: excisional biopsy. ES: endoscopic sphincterotomy. ERP: endoscopic retrograde pancreatography. ESR: erythrocyte sedimentation rate. FE: fibroscopic examination. HE: histological examinations. IP: intravenous pyelography. MRI: magnetic resonance imaging. SB: surgical biopsy. SL: slit lamp. US: ultrasonography. WB: western blot.

**References**

1. Dowlati Y, Dowlati A, Seyyedi B. Cutaneous fascioliasis. Medical Journal of The Islamic Republic of Iran (MJIRI). 1987;1(1):62-5.

2. LE THI X, Hung NT, Waikagul J. Cutaneous fascioliasis: a case report in Vietnam. The American journal of tropical medicine and hygiene. 2005;72(5):508-9.

3. Yi-zhu X, Zhi-bang Y. A case of ectopic fascioliasis in the skin. Tropical doctor. 2010;40(4):253-4.

4. Chang E-C, Choi H-L, Park Y-W, Kong Y, Cho S-Y. Subcutaneous fascioliasis: a case report. Korean J Parasitol. 1991;29(4):403-5.

5. EMAMI AL-AGHA M, ATHARI A. SUBCU TANEOUS FASCIOLIASIS: A RARE COMPLICATION. Medical Journal of The Islamic Republic of Iran (MJIRI). 1995;8(4):269-70.

6. Cho S-Y, Yang HN, Kong Y, Kim JC, Shin KW, Koo BS. Intraocular fascioliasis: a case report. The American journal of tropical medicine and hygiene. 1994;50(3):349-53.

7. Dalimi A, Jabarvand M. Fasciola hepatica in the human eye. Transactions of the Royal Society of Tropical Medicine and Hygiene. 2005;99(10):798-800.

8. Ying M, Xiaosu H, Wang B. A case of ectopic parasitism: Fasciola hepatica larvae burrow through a human brain and mimic cerebral aneurysm. Transactions of the Royal Society of Tropical Medicine and Hygiene. 2007;101(10):1051-2.

9. Zhou L, Luo L, You C, Wang B, Xu J, Liao L, et al. Multiple brain hemorrhages and hematomas associated with ectopic fascioliasis in brain and eye. Surgical neurology. 2008;69(5):516-21.

10. Ruggieri F, Correa AJ, Martinez E. Cerebral distomiasis: case report. Journal of neurosurgery. 1967;27(3):268-71.

11. Lee SH, Cho SY, Seo BS, Choe KJ, Chi JG. A human case of ectopic fascioliasis in Korea. Korean J Parasitol. 1982;20(2):191-200.

12. Park CI, Kim H, Ro JY, Gutierrez Y. Human ectopic fascioliasis in the cecum. The American journal of surgical pathology. 1984;8(1):73-7.

13. Makay O, Gurcu B, Caliskan C, Nart D, Tuncyurek M, Korkut M. Ectopic fascioliasis mimicking a colon tumor. World Journal of Gastroenterology: WJG. 2007;13(18):2633.

14. Öngören AU, Özkan AT, Demirel AH, Üstün H, Dönmez M. Ectopic intra-abdominal fascioliasis. Turkish Journal of Medical Sciences. 2009;39(5):819-23.

15. ÖZKAN AT. A case of ectopic intraabdominal fascioliasis presented with acute abdomen. Turk J Gastroenterol. 2011;22(3):347-50.

16. Kim AJ, Choi CH, Choi SK, Shin YW, Park Y-K, Kim L, et al. Ectopic human Fasciola hepatica infection by an adult worm in the mesocolon. The Korean journal of parasitology. 2015;53(6):725.

17. Fujita S, Beppu M, Haku K, Fujimoto K, Hirai T, Murai N, et al. A Case Report of Fascioliasis in the Pancreas Preoperatively Diagnosed as Cystadenocarcinoma by Endoscopic Retrograde Pancreatography.

18. Echenique-Elizondo M, Amondarain J, Liron de Robles C. Fascioliasis: an exceptional cause of acute pancreatitis. JOP. 2005;6(1):36-9.

19. Parsak C, Koltas I, Sakman G, Erkocak E, Inal M. Surgery in Fasciola hepatica pancreatitis: report of a case and review of literature. Zeitschrift für Gastroenterologie. 2007;45(04):313-6.

20. Marcos LA, Légua P, Sánchez J, Espinoza JR, Yi P, Tantaleán M. Cervical tumor caused by the sexually mature stage of Fasciola hepatica. Transactions of the Royal Society of Tropical Medicine and Hygiene. 2009;103(3):318-20.

21. Fazlipour A, Ranjbari N, Eslami N, Lotfi M. FASCIOLA HEPATICA AS A NECK MASS.

22. Mohammadi-Ghalehbin B, Chinifroush-Asl MM, Ramzi F. Extra-hepatic fascioliasis with peritoneal malignancy tumor feature. Journal of Parasitic Diseases. 2012;36(1):78-80.

23. Prociv P, Walker J, Whitby M. Human ectopic fascioliasis in Australia: first case reports. The Medical journal of Australia. 1992;156(5):349-51.

24. Musa D, Godbole G, Chiodini PL, Phillips R. Unusual case of a lung abscess. BMJ case reports. 2013;2013:bcr2012008306.

25. Vatsal DK, Kapoor S, Venkatesh V, Vatsal P, Husain N. Ectopic fascioliasis in the dorsal spine: case report. Neurosurgery. 2006;59(3):E706-7; discussion E-7.
